# Supplementary material for: Medication Adherence and the Occurrence of Complications in Patients with Newly Diagnosed Hypertension
Source: PubMed Central journal article supplement — Korean Circ J. 2016 Apr 26;46(3):384–93. doi: 10.4070/kcj.2016.46.3.384 (PMC4891603; doi:10.4070/kcj.2016.46.3.384), 2016-04-26
Supplement: kcj-46-384-s001.pdf [file kcj-46-384-s001.pdf]

**Supplementary Table.** Anti-hypertensive agents and constituents

| Categorizations |                                             | Ingredients no. |
|-----------------|---------------------------------------------|-----------------|
| D002            | beta blocker                                | 5               |
| D003            | alpha blocker                               | 3               |
| D004            | angiotensin converting enzyme inhibitor     | 17              |
| D006            | angiotensin II receptor antagonists         | 6               |
| D007            | alpha and beta blocker                      | 5               |
| D010            | vasodilator                                 | 1               |
| D011            | diuretics_thiazide                          | 2               |
| D012            | diuretics_loop                              | 2               |
| D013            | diuretics_K+-sparing                        | 2               |
| D014            | diuretics_other                             | 2               |
| D051            | calcium channel blocker dihydropyridines    | 15              |
| D052            | calcium channel blocker nondihydropyridines | 2               |
